# Supplementary material for: Dynamic coupling of regulated binding sites and cycling myosin heads in striated muscle
Source: PubMed Central journal article supplement — J Gen Physiol. 2014 Mar;143(3):387–99. doi: 10.1085/jgp.201311078 (PMC3933939; doi:10.1085/jgp.201311078), 2014-03
Supplement: supp_jgp.201311078_JGP_201311078_sm.pdf [file supp_jgp.201311078_JGP_201311078_sm.pdf]

Campbell, <http://www.jgp.org/cgi/content/full/jgp.201311078/DC1>

This supplement provides additional information about the simulations that were described in the main text. Data files and tutorials explaining how to reproduce the modeling results are available at <http://www.myosim.org>.

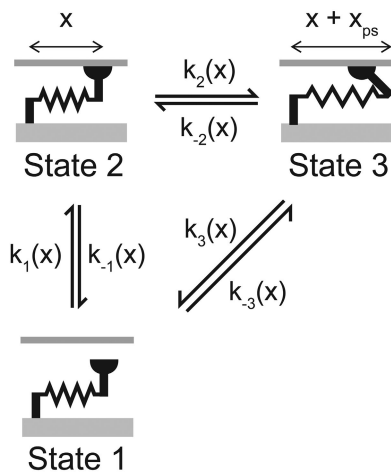

Figure S1. Three-state myosin scheme.

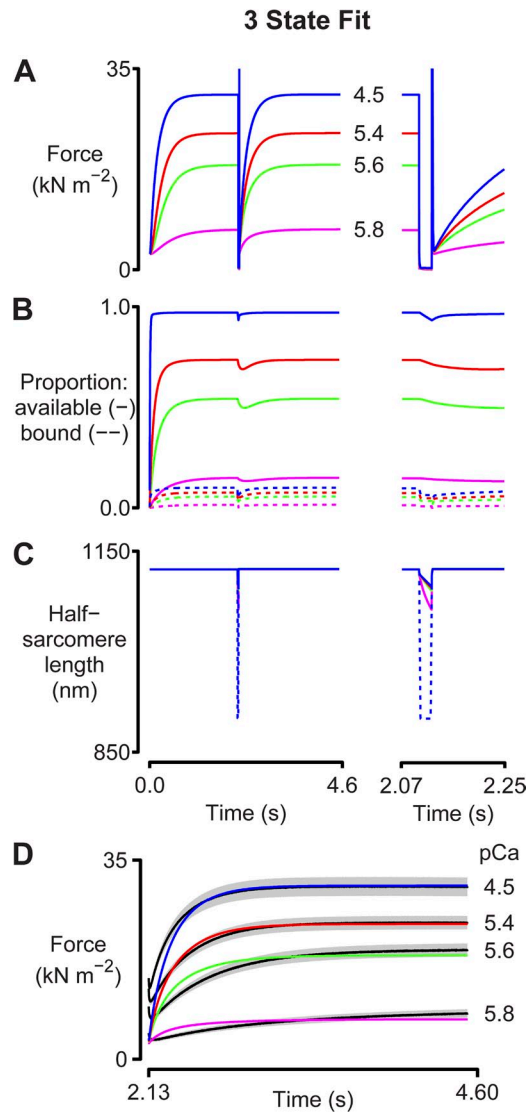

**Figure S2.** Three-state fit. Simulations fitted to tension-recovery records measured with chemically permeabilized myocardial samples. The calculations used the three-state myosin scheme shown in Fig. S1 with the model parameters listed in Table S5. Panels show (A) predicted force records, (B) the proportion of binding sites that are available (solid lines) and that are bound (dotted lines), and (C) the half-sarcomere lengths. The imposed length change is shown by the dotted line. The left-hand axes show the entire simulation. The right-hand axes show the response to the length perturbation on an expanded time scale. (D) The simulated force records overlaid on the experimental force records (black lines). The gray regions around each line show the standard error of the experimental data.

Table S1  
Model parameters for simulations in Figs. 1 and 2

| Parameter                    | Value                            | Units                          |
|------------------------------|----------------------------------|--------------------------------|
| $N_0^a$                      | $6.9 \times 10^{16}$             | $\text{m}^{-2}$                |
| $a_{\text{on}}$              | $10^7$                           | $\text{s}^{-1} \text{M}^{-1}$  |
| $a_{\text{off}}$             | 50                               | $\text{s}^{-1}$                |
| $k_1(x)$ , fast <sup>b</sup> | $10 e^{\frac{k_B x^2}{2k_B T}}$  | $\text{s}^{-1} \text{nm}^{-1}$ |
| $k_{-1}(x)$ , fast           | 100                              | $\text{s}^{-1}$                |
| $k_1(x)$ , slow              | $0.5 e^{\frac{k_B x^2}{2k_B T}}$ | $\text{s}^{-1} \text{nm}^{-1}$ |
| $k_{-1}(x)$ , slow           | 5                                | $\text{s}^{-1}$                |
| $x_{\text{ps}}$              | 5                                | nm                             |
| $k_{\text{cb}}$              | 2                                | $\text{pN nm}^{-1}$            |

x is as defined in Fig. 1 A in nanometers.

<sup>a</sup> $N_0$  is the number of myosin heads in a hypothetical cardiac half-sarcomere with a cross-sectional area of  $1 \text{ m}^2$ . This estimate was obtained by assuming that thick filaments contain 283 myosin heads and have a spatial density of  $0.407 \times 10^{15} \text{ m}^{-2}$  within myofibrils (Linari et al. 2007. *Biophys. J.* 92:2476–2490), and that myofibrils occupy 60% of the cross-section of myocardium (the remainder being mitochondria).

<sup>b</sup> $k_B$  is Boltzmann's constant ( $1.381 \times 10^{-23} \text{ J K}^{-1}$ ). T is the experimental temperature (assumed to be 288 K).

Table S2  
Model parameters for simulations in Fig. 3 (two-state fit)

| Parameter              | Value                                                                | Units                          | Source <sup>a</sup> |
|------------------------|----------------------------------------------------------------------|--------------------------------|---------------------|
| $N_0$                  | $6.9 \times 10^{16}$                                                 | $\text{m}^{-2}$                | Predefined          |
| $a_{\text{on}}$        | $10^{6.52}$                                                          | $\text{s}^{-1} \text{M}^{-1}$  | Calculated          |
| $a_{\text{off}}$       | 9.33                                                                 | $\text{s}^{-1}$                | Calculated          |
| $k_1(x)$               | $0.318 e^{\frac{k_B x^2}{2k_B T}}$                                   | $\text{s}^{-1} \text{nm}^{-1}$ | Calculated          |
| $k_{-1}(x)$            | $5.65 + 0.845 x^4$ for $x > 0$<br>$5.65 + 3.48 x^4$ for $x < 0$      | $\text{s}^{-1}$                | Calculated          |
| $k_{\text{plus}}$      | 47.5                                                                 | $\text{s}^{-1}$                | Calculated          |
| $k_{\text{minus}}$     | 4.69                                                                 | $\text{s}^{-1}$                | Calculated          |
| $x_{\text{ps}}$        | 1.61                                                                 | nm                             | Calculated          |
| $k_{\text{cb}}$        | 2                                                                    | $\text{pN nm}^{-1}$            | Predefined          |
| $F_{\text{passive}}^b$ | $3.21 \times 10^{-8} \left( e^{\frac{\text{HSL}}{44.6}} - 1 \right)$ | $\text{N m}^{-2}$              | Predefined          |

HSL is the half-sarcomere length in nanometers.

<sup>a</sup>Predefined parameters were set at the beginning of the calculations based on values from the literature and prior experience. Calculated parameter values were obtained by fitting the simulations to the experimental data.

<sup>b</sup> $F_{\text{passive}}$  is the passive elastic force generated by titin and/or collagen filaments and was determined from separate experiments in which the muscle preparations were stretched in solutions with a pCa value of 9.0 (minimal activation).

*Table S3*  
*Model parameters for simulations in Fig. 5 (six-state fit)*

| Parameter            | Value                                                                | Units                          | Source     |
|----------------------|----------------------------------------------------------------------|--------------------------------|------------|
| $N_0$                | $6.9 \times 10^{16}$                                                 | $\text{m}^{-2}$                | Predefined |
| $a_{\text{on}}$      | $10^{6.72}$                                                          | $\text{s}^{-1} \text{M}^{-1}$  | Calculated |
| $a_{\text{off}}$     | 13.1                                                                 | $\text{s}^{-1}$                | Calculated |
| $k_1(x)$             | $9.34 e^{\frac{k_p x^2}{2k_B T}}$                                    | $\text{s}^{-1} \text{nm}^{-1}$ | Calculated |
| $k_{-1}(x)$          | $499 + 9.38 x^{4.02}$                                                | $\text{s}^{-1}$                | Calculated |
| $k_2(x)$             | 2.68                                                                 | $\text{s}^{-1}$                | Calculated |
| $k_{-2}(x)$          | 0                                                                    | $\text{s}^{-1}$                | Predefined |
| $k_3(x)$             | 3.85                                                                 | $\text{s}^{-1}$                | Calculated |
| $k_{-3}(x)$          | 0                                                                    | $\text{s}^{-1}$                | Predefined |
| $k_4(x)$             | 17.3 for $x > 0$<br>$17.3 + 0.0507 x^{4.02}$ for $x < 0$             | $\text{s}^{-1}$                | Calculated |
| $k_{-4}(x)$          | 0                                                                    | $\text{s}^{-1}$                | Predefined |
| $k_5(x)$             | 1,000                                                                | $\text{s}^{-1}$                | Predefined |
| $k_{-5}(x)$          | 0                                                                    | $\text{s}^{-1}$                | Predefined |
| $k_6(x)$             | $828 e^{\frac{k_p x^2}{2k_B T}}$                                     | $\text{s}^{-1} \text{nm}^{-1}$ | Calculated |
| $k_{-6}(x)$          | $0.130 + 0.153 x^{4.01}$                                             | $\text{s}^{-1}$                | Calculated |
| $k_{\text{plus}}$    | 73.7                                                                 | $\text{s}^{-1}$                | Calculated |
| $k_{\text{minus}}$   | 7.44                                                                 | $\text{s}^{-1}$                | Calculated |
| $x_{\text{ps},1}$    | 4.38                                                                 | nm                             | Calculated |
| $x_{\text{ps},2}$    | 1.16                                                                 | nm                             | Calculated |
| $k_{\text{cb}}$      | 2                                                                    | $\text{pN nm}^{-1}$            | Predefined |
| $F_{\text{passive}}$ | $3.21 \times 10^{-8} \left( e^{\frac{\text{HSL}}{44.6}} - 1 \right)$ | $\text{N m}^{-2}$              | Predefined |

*Table S4*  
*Model parameters for simulations in Fig. 6 (unloaded twitch contraction)*

| Parameter              | Value                                                        | Units                          | Source     |
|------------------------|--------------------------------------------------------------|--------------------------------|------------|
| $N_0$                  | $6.9 \times 10^{16}$                                         | $\text{m}^{-2}$                | Predefined |
| $a_{\text{on}}$        | $10^{7.71}$                                                  | $\text{s}^{-1} \text{M}^{-1}$  | Calculated |
| $a_{\text{off}}$       | 977                                                          | $\text{s}^{-1}$                | Calculated |
| $k_1(x)$               | $1,320 e^{\frac{k_p x^2}{2k_B T}}$                           | $\text{s}^{-1} \text{nm}^{-1}$ | Calculated |
| $k_{-1}(x)$            | $512 + 4.87 x^4$ for $x > 0$<br>$512 + 12.1 x^4$ for $x < 0$ | $\text{s}^{-1}$                | Calculated |
| $k_{\text{plus}}$      | 55.6                                                         | $\text{s}^{-1}$                | Calculated |
| $x_{\text{ps}}$        | 5.87                                                         | nm                             | Calculated |
| $k_{\text{cb}}$        | 2                                                            | $\text{pN nm}^{-1}$            | Predefined |
| $F_{\text{passive}}^a$ | $1,000 \times (\text{HSL} - 950)$                            | $\text{N m}^{-2}$              | Predefined |

HSL is measured in nanometers.

<sup>a</sup> $F_{\text{passive}}$  is an estimate of the passive elastic force generated by titin filaments.

*Table S5*  
*Model parameters for simulations in Fig. S2 (three-state fit)*

| Parameter            | Value                                                         | Units                          | Source     |
|----------------------|---------------------------------------------------------------|--------------------------------|------------|
| $N_0$                | $6.9 \times 10^{16}$                                          | $\text{m}^{-2}$                | Predefined |
| $a_{\text{on}}$      | $10^{6.46}$                                                   | $\text{s}^{-1} \text{M}^{-1}$  | Calculated |
| $a_{\text{off}}$     | 6.33                                                          | $\text{s}^{-1}$                | Calculated |
| $k_1(x)$             | $32.7 e^{\frac{k_{\text{ps}} x^2}{2k_{\text{ps}}}}$           | $\text{s}^{-1} \text{nm}^{-1}$ | Calculated |
| $k_{-1}(x)$          | $1584 + 0.721 x^4$                                            | $\text{s}^{-1}$                | Calculated |
| $k_2(x)$             | 5.00                                                          | $\text{s}^{-1}$                | Calculated |
| $k_{-2}(x)$          | 0                                                             | $\text{s}^{-1}$                | Predefined |
| $k_3(x)$             | $4.50 + 5.33 x^4$                                             | $\text{s}^{-1}$                | Calculated |
| $k_{-3}(x)$          | 0                                                             | $\text{s}^{-1}$                | Predefined |
| $k_{\text{plus}}$    | 29.5                                                          | $\text{s}^{-1}$                | Calculated |
| $k_{\text{minus}}$   | 4.10                                                          | $\text{s}^{-1}$                | Calculated |
| $x_{\text{ps}}$      | 5.49                                                          | nm                             | Calculated |
| $k_{\text{cb}}$      | 2                                                             | $\text{pN nm}^{-1}$            | Predefined |
| $F_{\text{passive}}$ | $3.21 \times 10^{-8} \left( e^{\frac{HSL}{44.6}} - 1 \right)$ | $\text{N m}^{-2}$              | Predefined |
